# Supplementary material for: QTL and Candidate Genes for Seed Tocopherol Content in ‘Forrest’ by ‘Williams 82’ Recombinant Inbred Line (RIL) Population of Soybean
Source: MDPI journal article supplement (doi:10.3390/plants11091258), 2022-05-06
Supplement: s1 [file s1]

**Table S1.** Expression profiles of the tocopherol biosynthesis candidate genes in soybean based on RNAseq data available from RNAsequencing data (<http://www.soybase.org/soyseq>)

| Gene ID         | young<br>_leaf | flower | one<br>cm<br>pod | pod<br>shell<br>10DA<br>F | pod<br>shell<br>14DAF | seed<br>10<br>DAF | seed<br>14<br>DAF | seed<br>21<br>DAF | seed<br>25<br>DAF | seed<br>28<br>DAF | seed<br>35<br>DAF | seed<br>42<br>DAF | root | nodule |
|-----------------|----------------|--------|------------------|---------------------------|-----------------------|-------------------|-------------------|-------------------|-------------------|-------------------|-------------------|-------------------|------|--------|
| Glyma.01G134600 | 0              | 31     | 8                | 11                        | 4                     | 0                 | 1                 | 0                 | 0                 | 0                 | 0                 | 0                 | 17   | 8      |
| Glyma.02G002000 | 372            | 116    | 77               | 101                       | 98                    | 19                | 24                | 7                 | 29                | 22                | 21                | 4                 | 1    | 1      |
| Glyma.02G143700 | 420            | 181    | 249              | 332                       | 411                   | 86                | 143               | 67                | 112               | 90                | 100               | 69                | 111  | 145    |
| Glyma.02G273800 | 54             | 67     | 75               | 43                        | 31                    | 57                | 64                | 39                | 134               | 155               | 369               | 423               | 207  | 176    |
| Glyma.02G284600 | 2              | 5      | 5                | 1                         | 0                     | 1                 | 4                 | 0                 | 3                 | 2                 | 1                 | 0                 | 1    | 1      |
| Glyma.03G033100 | 0              | 0      | 0                | 0                         | 0                     | 0                 | 0                 | 0                 | 0                 | 0                 | 0                 | 0                 | 0    | 0      |
| Glyma.04G082300 | 0              | 34     | 9                | 9                         | 5                     | 8                 | 19                | 3                 | 32                | 26                | 60                | 44                | 0    | 0      |
| Glyma.04G082500 | 47             | 48     | 38               | 46                        | 18                    | 17                | 25                | 16                | 31                | 46                | 65                | 51                | 8    | 10     |
| Glyma.05G026200 | 2036           | 534    | 1154             | 1088                      | 756                   | 158               | 363               | 217               | 743               | 779               | 823               | 556               | 275  | 423    |
| Glyma.06G084100 | 165            | 74     | 85               | 99                        | 51                    | 32                | 36                | 19                | 36                | 35                | 52                | 21                | 45   | 49     |
| Glyma.06G235500 | 18             | 717    | 19               | 23                        | 9                     | 8                 | 6                 | 4                 | 19                | 14                | 52                | 41                | 2    | 13     |
| Glyma.06G235900 | 20             | 644    | 398              | 457                       | 187                   | 5                 | 5                 | 3                 | 24                | 20                | 24                | 10                | 5    | 57     |
| Glyma.09G222800 | 32             | 93     | 60               | 76                        | 261                   | 18                | 25                | 9                 | 35                | 21                | 28                | 10                | 212  | 47     |
| Glyma.10G030600 | 280            | 107    | 160              | 167                       | 267                   | 42                | 80                | 43                | 87                | 57                | 82                | 27                | 134  | 158    |
| Glyma.10G070100 | 1              | 3      | 2                | 0                         | 0                     | 0                 | 0                 | 0                 | 0                 | 0                 | 0                 | 0                 | 2    | 0      |
| Glyma.10G070300 | 0              | 0      | 0                | 0                         | 0                     | 3                 | 2                 | 0                 | 1                 | 0                 | 1                 | 0                 | 3    | 0      |
| Glyma.10G295300 | 0              | 0      | 0                | 0                         | 1                     | 2                 | 0                 | 0                 | 0                 | 0                 | 0                 | 0                 | 67   | 19     |
| Glyma.12G014200 | 5              | 125    | 52               | 25                        | 41                    | 35                | 45                | 25                | 17                | 10                | 7                 | 1                 | 27   | 0      |
| Glyma.12G014300 | 152            | 99     | 63               | 61                        | 44                    | 9                 | 18                | 16                | 26                | 22                | 44                | 25                | 9    | 90     |
| Glyma.12G161500 | 22             | 12     | 111              | 166                       | 164                   | 66                | 101               | 47                | 180               | 194               | 275               | 103               | 0    | 403    |
| Glyma.12G205900 | 62             | 103    | 164              | 98                        | 55                    | 50                | 73                | 50                | 16                | 2                 | 7                 | 1                 | 72   | 12     |
| Glyma.12G233800 | 91             | 44     | 69               | 73                        | 59                    | 27                | 49                | 25                | 71                | 34                | 44                | 26                | 88   | 50     |
| Glyma.13G097800 | 29             | 568    | 21               | 15                        | 6                     | 60                | 27                | 16                | 15                | 14                | 18                | 6                 | 21   | 34     |
| Glyma.13G152746 | 1              | 0      | 0                | 0                         | 0                     | 0                 | 0                 | 0                 | 0                 | 0                 | 0                 | 0                 | 1    | 1      |
| Glyma.13G152780 | 16             | 13     | 2                | 1                         | 1                     | 0                 | 0                 | 0                 | 1                 | 0                 | 0                 | 0                 | 0    | 4      |
| Glyma.13G152814 | 0              | 0      | 0                | 0                         | 0                     | 0                 | 0                 | 0                 | 0                 | 0                 | 0                 | 0                 | 4    | 0      |
| Glyma.13G265200 | 126            | 75     | 84               | 93                        | 88                    | 32                | 51                | 28                | 83                | 50                | 62                | 33                | 119  | 55     |
| Glyma.13G295000 | 2              | 17     | 21               | 12                        | 8                     | 8                 | 4                 | 1                 | 0                 | 0                 | 0                 | 0                 | 27   | 1491   |
| Glyma.14G030400 | 97             | 706    | 96               | 122                       | 39                    | 77                | 81                | 38                | 209               | 130               | 111               | 48                | 53   | 55     |
| Glyma.17G061900 | 21             | 39     | 29               | 26                        | 18                    | 9                 | 6                 | 16                | 24                | 16                | 32                | 15                | 10   | 2      |
| Glyma.17G100700 | 1567           | 322    | 568              | 556                       | 391                   | 33                | 83                | 87                | 320               | 240               | 313               | 183               | 44   | 59     |
| Glyma.20G190100 | 37             | 32     | 15               | 7                         | 14                    | 14                | 16                | 7                 | 20                | 18                | 28                | 8                 | 13   | 22     |
| Glyma.20G211500 | 3              | 2      | 0                | 0                         | 0                     | 5                 | 0                 | 0                 | 0                 | 0                 | 3                 | 0                 | 6    | 2      |
| Glyma.20G245100 | 0              | 14     | 1                | 1                         | 0                     | 0                 | 1                 | 0                 | 0                 | 0                 | 0                 | 0                 | 21   | 6      |

**Table S2.** QTLs identified in previous studies on Chr. 6.

| QTL                        | Start (cM) | End (cM) | QTL Start | QTL End  | Parents                  | Number loci tested | Lod score | Interval length | Reference |
|----------------------------|------------|----------|-----------|----------|--------------------------|--------------------|-----------|-----------------|-----------|
| Seed tocopherol, alpha 1-2 | 96.83      | 98.83    | 16106296  | 16256544 | OAC Bayfield X Hefeng 25 | 107                | ND        | ND              | [35]      |
| Seed tocopherol, alpha 2-2 | 97.83      | 107.58   | 15524734  | 17218677 | Hefeng 25 X OAC Bayfield | 606                | ND        | 9.75            | [34]      |
| Seed tocopherol, gamma 1-3 | 100.75     | 102.75   | 16029425  | 16133204 | OAC Bayfield X Hefeng 25 | 107                | ND        | ND              | [35]      |
| Seed tocopherol, gamma 2-3 | 94.65      | 101.75   | 16106296  | 16221044 | Hefeng 25 X OAC Bayfield | 606                | ND        | 7.5             | [34]      |
| Seed tocopherol, total 1-1 | 96.83      | 98.83    | 16106296  | 16256544 | OAC Bayfield X Hefeng 25 | 107                | ND        | ND              | [35]      |
| Seed tocopherol, total 1-2 | 100.75     | 102.75   | 16133204  | 16029425 | OAC Bayfield X Hefeng 25 | 107                | ND        | ND              | [35]      |
| Seed tocopherol, total 2-1 | 96.83      | 98.83    | 16106296  | 16256544 | Hefeng 25 X OAC Bayfield | 606                | ND        | ND              | [34]      |
| Seed tocopherol, total 2-2 | 94.65      | 101.75   | 16106296  | 16221044 | Hefeng 25 X OAC Bayfield | 606                | ND        | 7.1             | [34]      |
| qδTC-6                     | 116.9      | 118      | 42091687  | 43647797 | TK780 X B04009           | ND                 | 4.7       | ND              | [7]       |
|                            | 74.5       | 76.5     |           |          | TK780 X B04009           | ND                 | 5.6       | ND              | [7]       |
| qγTC-6                     |            |          | 14027025  | 14268479 | B04009                   |                    |           |                 |           |

**Table S3.** Positions of SNPs between Forrest and Williams 82 cultivars in the promoter of the tocopherol cyclase candidate gene (GmTC06, Glyma.06G084100).

| Region | Position | Williams 82               | Forrest |
|--------|----------|---------------------------|---------|
| 5'UTR  | 6464552  | G                         | A       |
|        | 6465186  | G                         | A       |
|        | 6465268  | C                         | T       |
|        | 6465403  | A                         | G       |
|        | 6465466  | C                         | T       |
|        | 6465531  | G                         | T       |
|        | 6465536  | G                         | A       |
|        | 6465698  | T                         | C       |
|        | 6465744  | G                         | C       |
|        | 6465768  | A                         | T       |
|        | 6465948  | CATATTCA                  | -       |
|        | 6466025  | T                         | C       |
|        | 6466060  | GCACGTGAGGTTTAACAAGTTGATT | -       |
|        | 6466090  | C                         | G       |

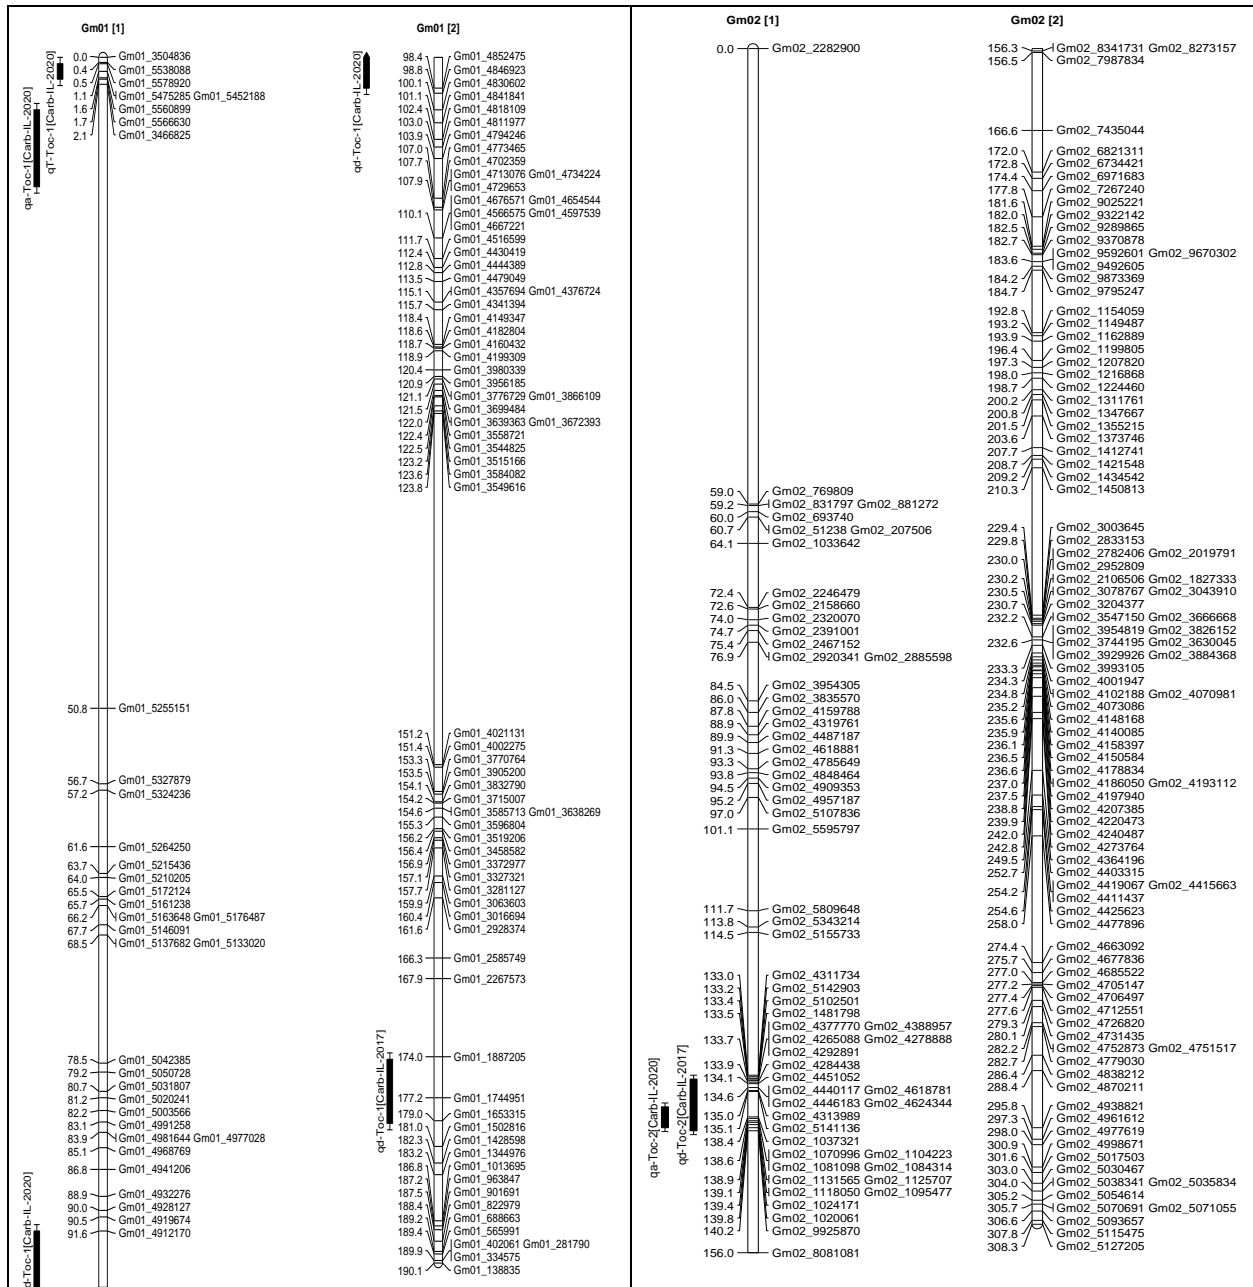

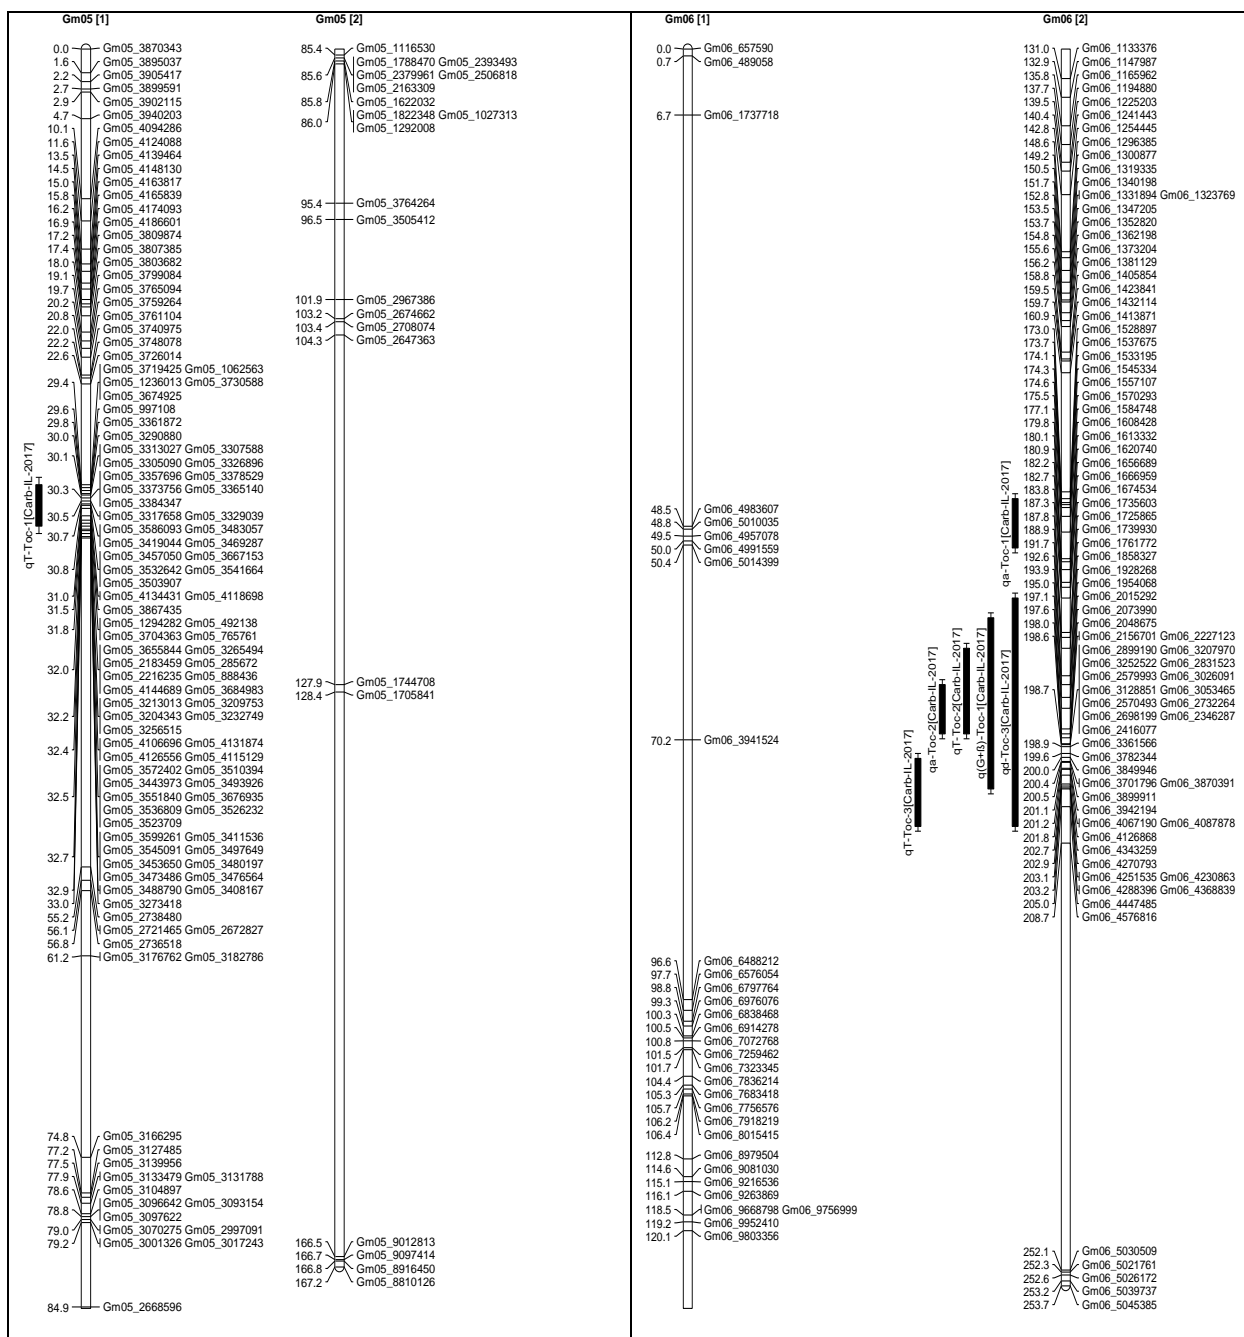

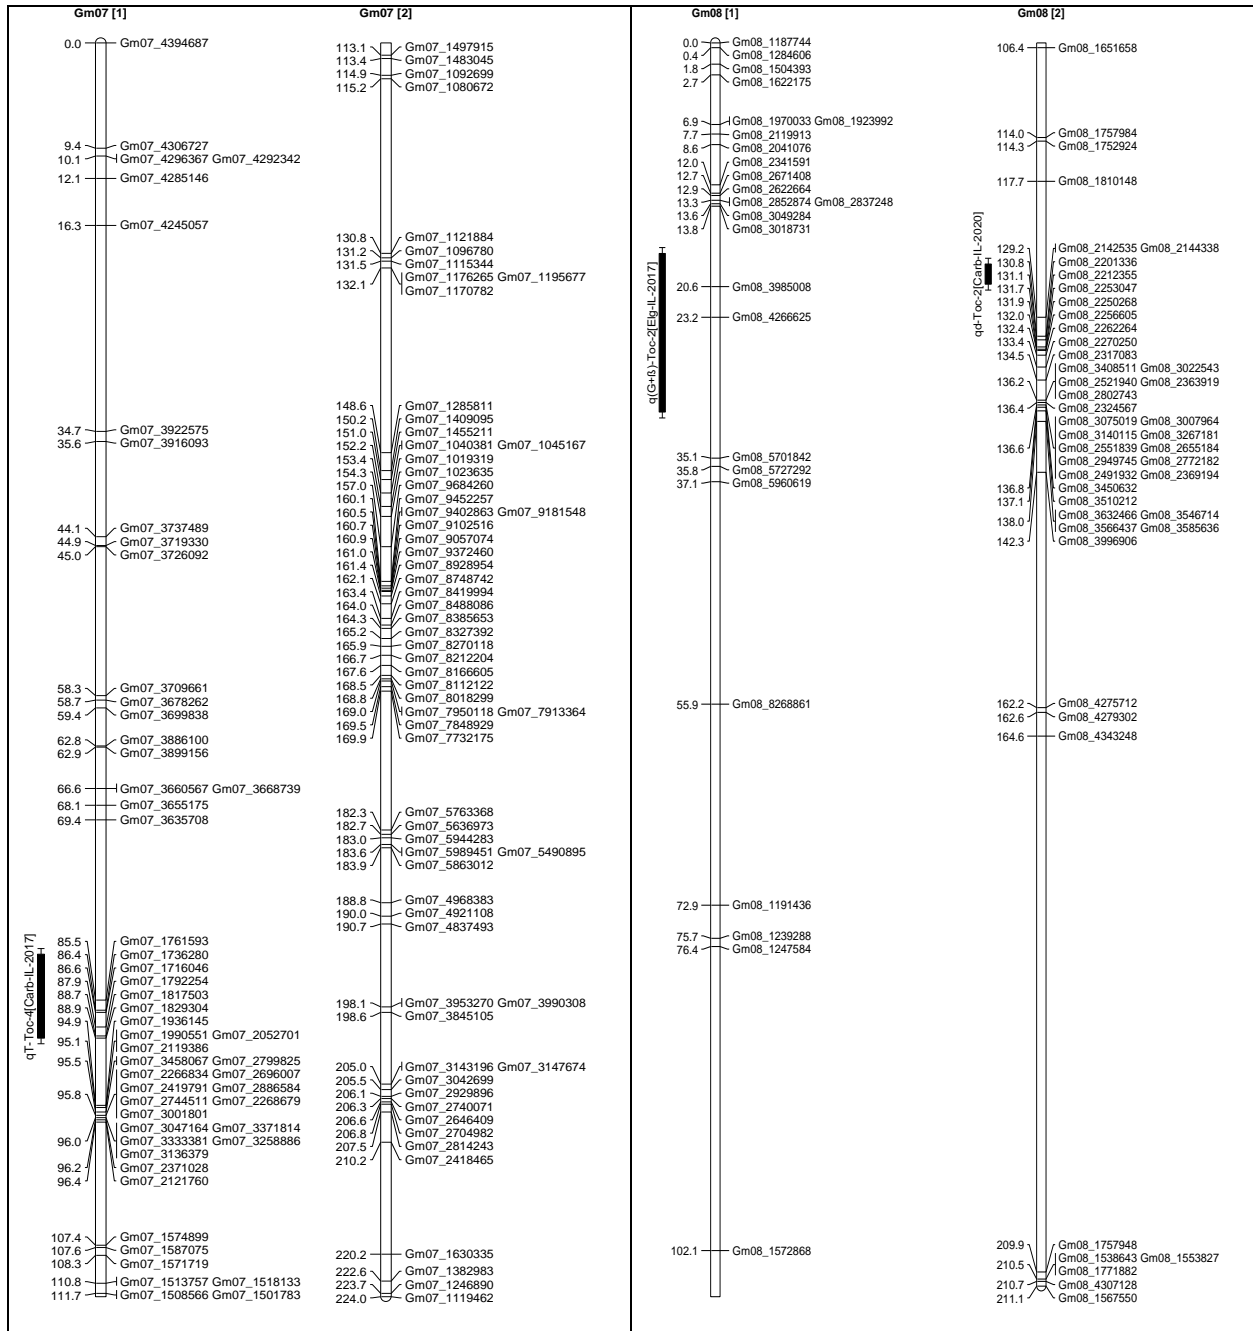

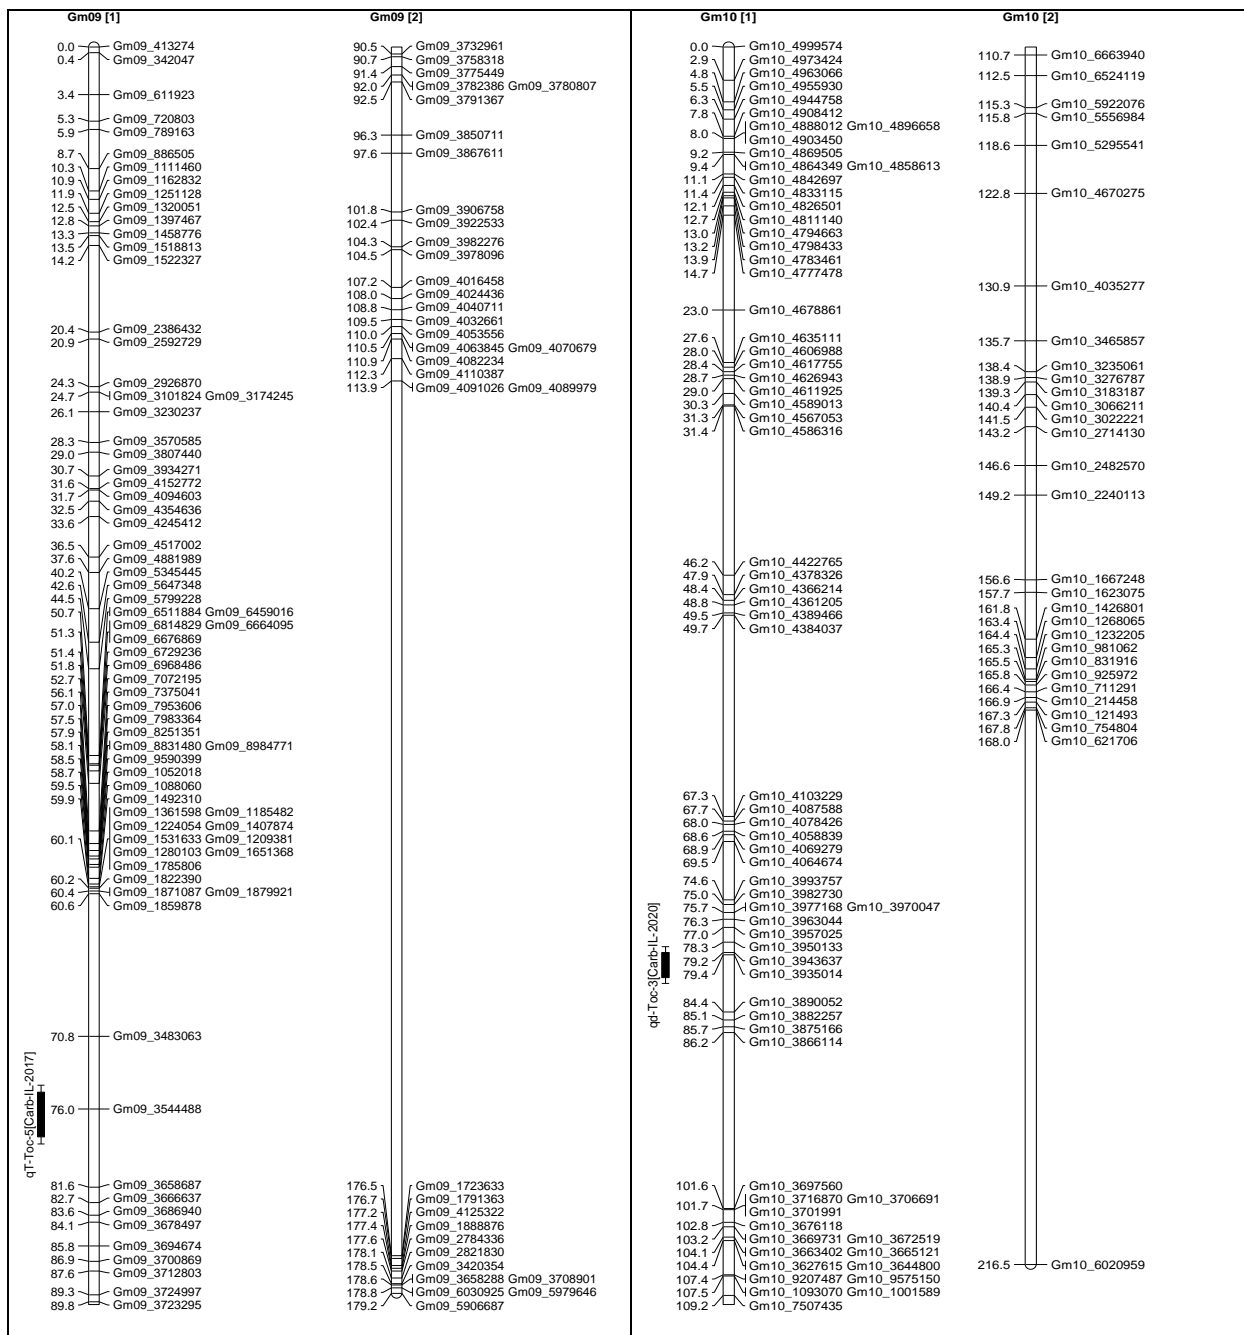

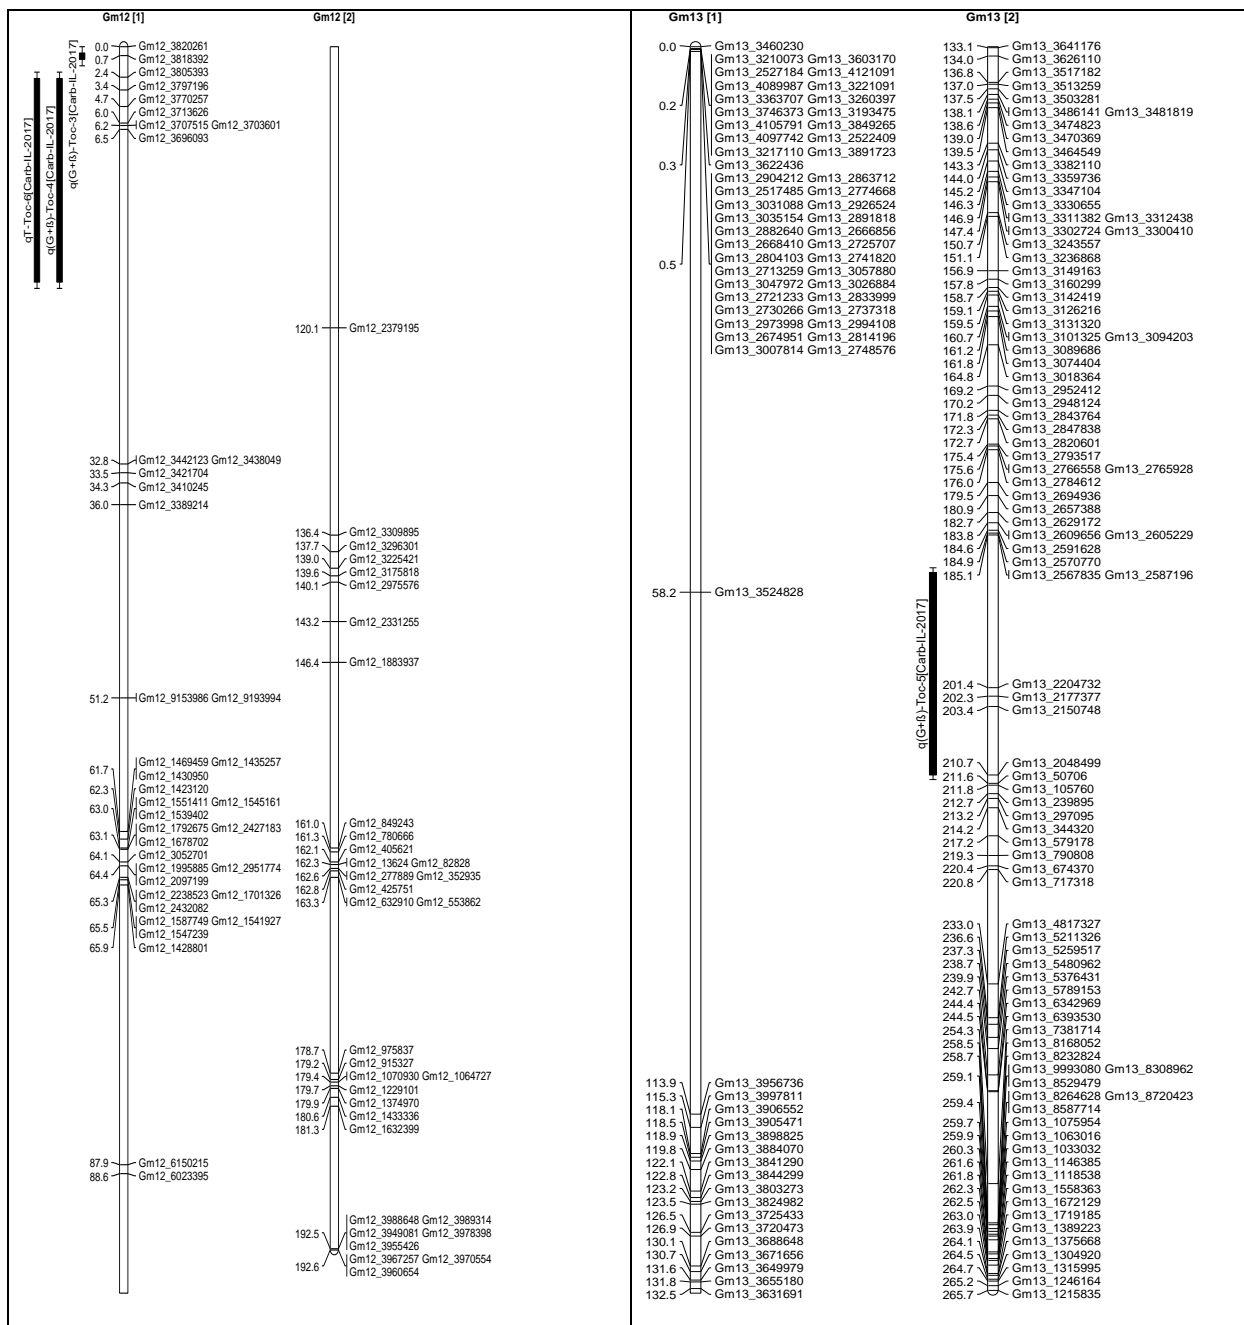

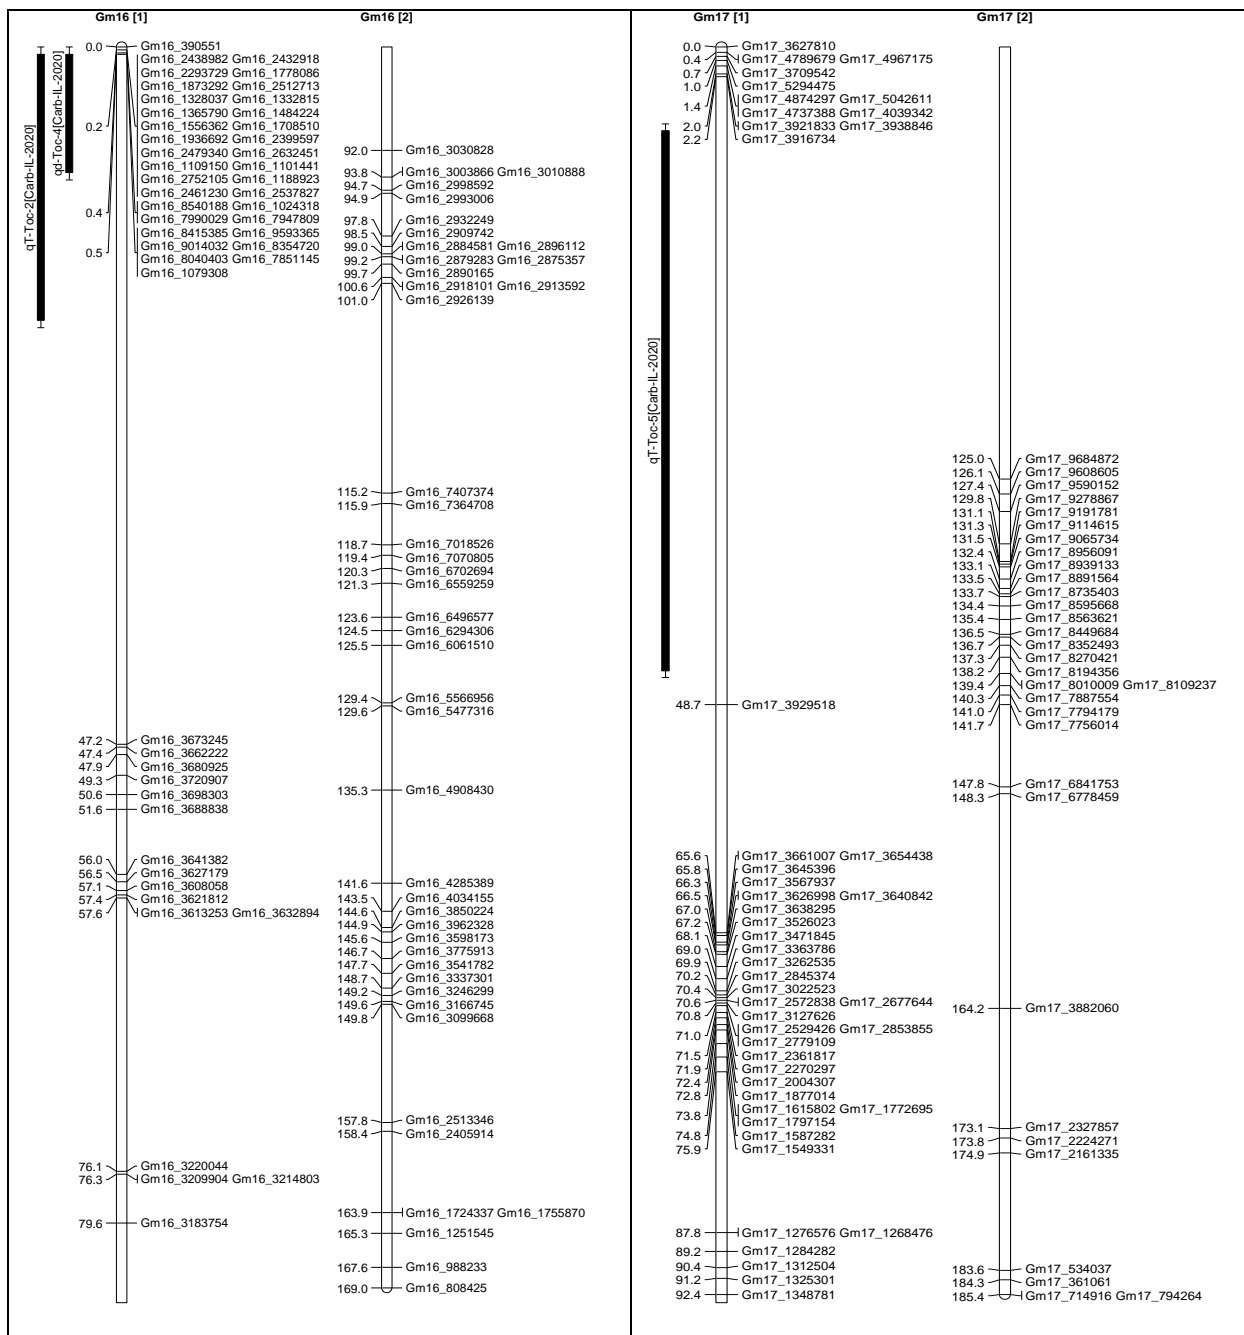



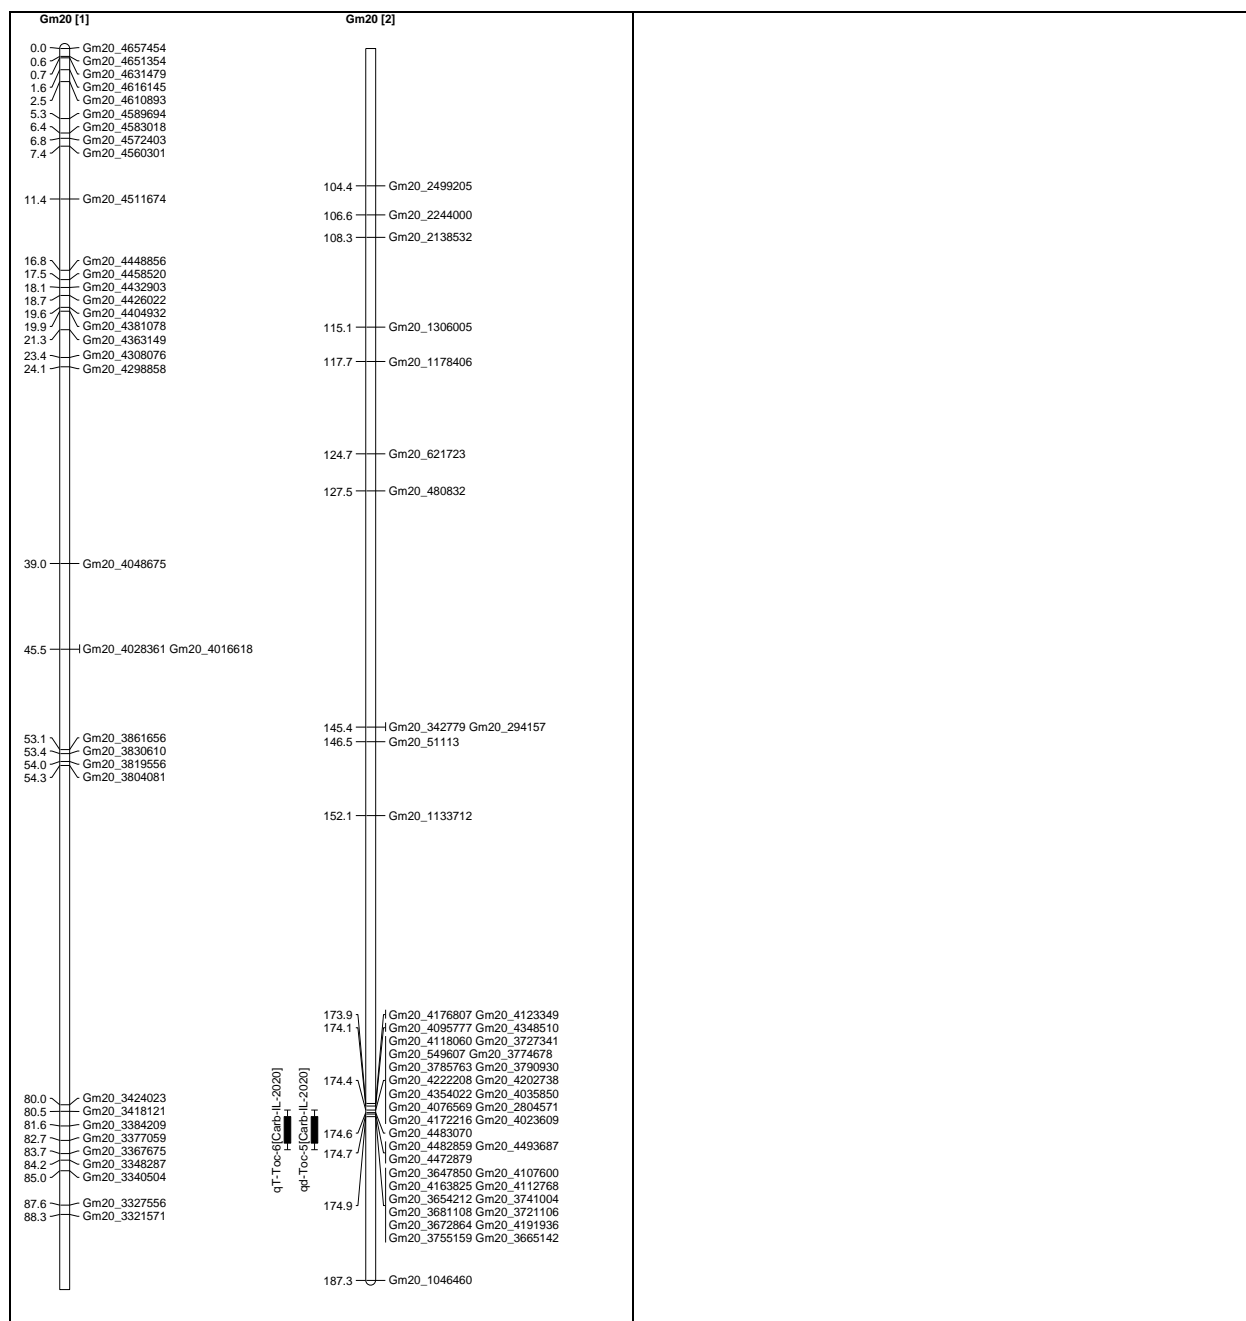

**Figure S1.** Positions of QTL that control seed  $\alpha$ -Tocopherol ( $\alpha$ -Toc),  $\delta$ -Tocopherol ( $\delta$ -Toc), ( $\gamma$ + $\beta$ )-Tocopherol ( $(\gamma$ + $\beta$ )-Toc), and Total-Tocopherols (T-Toc) contents on chromosomes 1, 2, 5, 6, 7, 8, 9, 10, 12, 13, 16, 17, and 20. The QTL have been identified in F×W82 grown in two environments in Carbondale, IL over two years (2017 and 2020). Legend: ( $\gamma$ + $\beta$ )=(G+ $\beta$ ) and (Carb-IL)=Carbondale, IL.

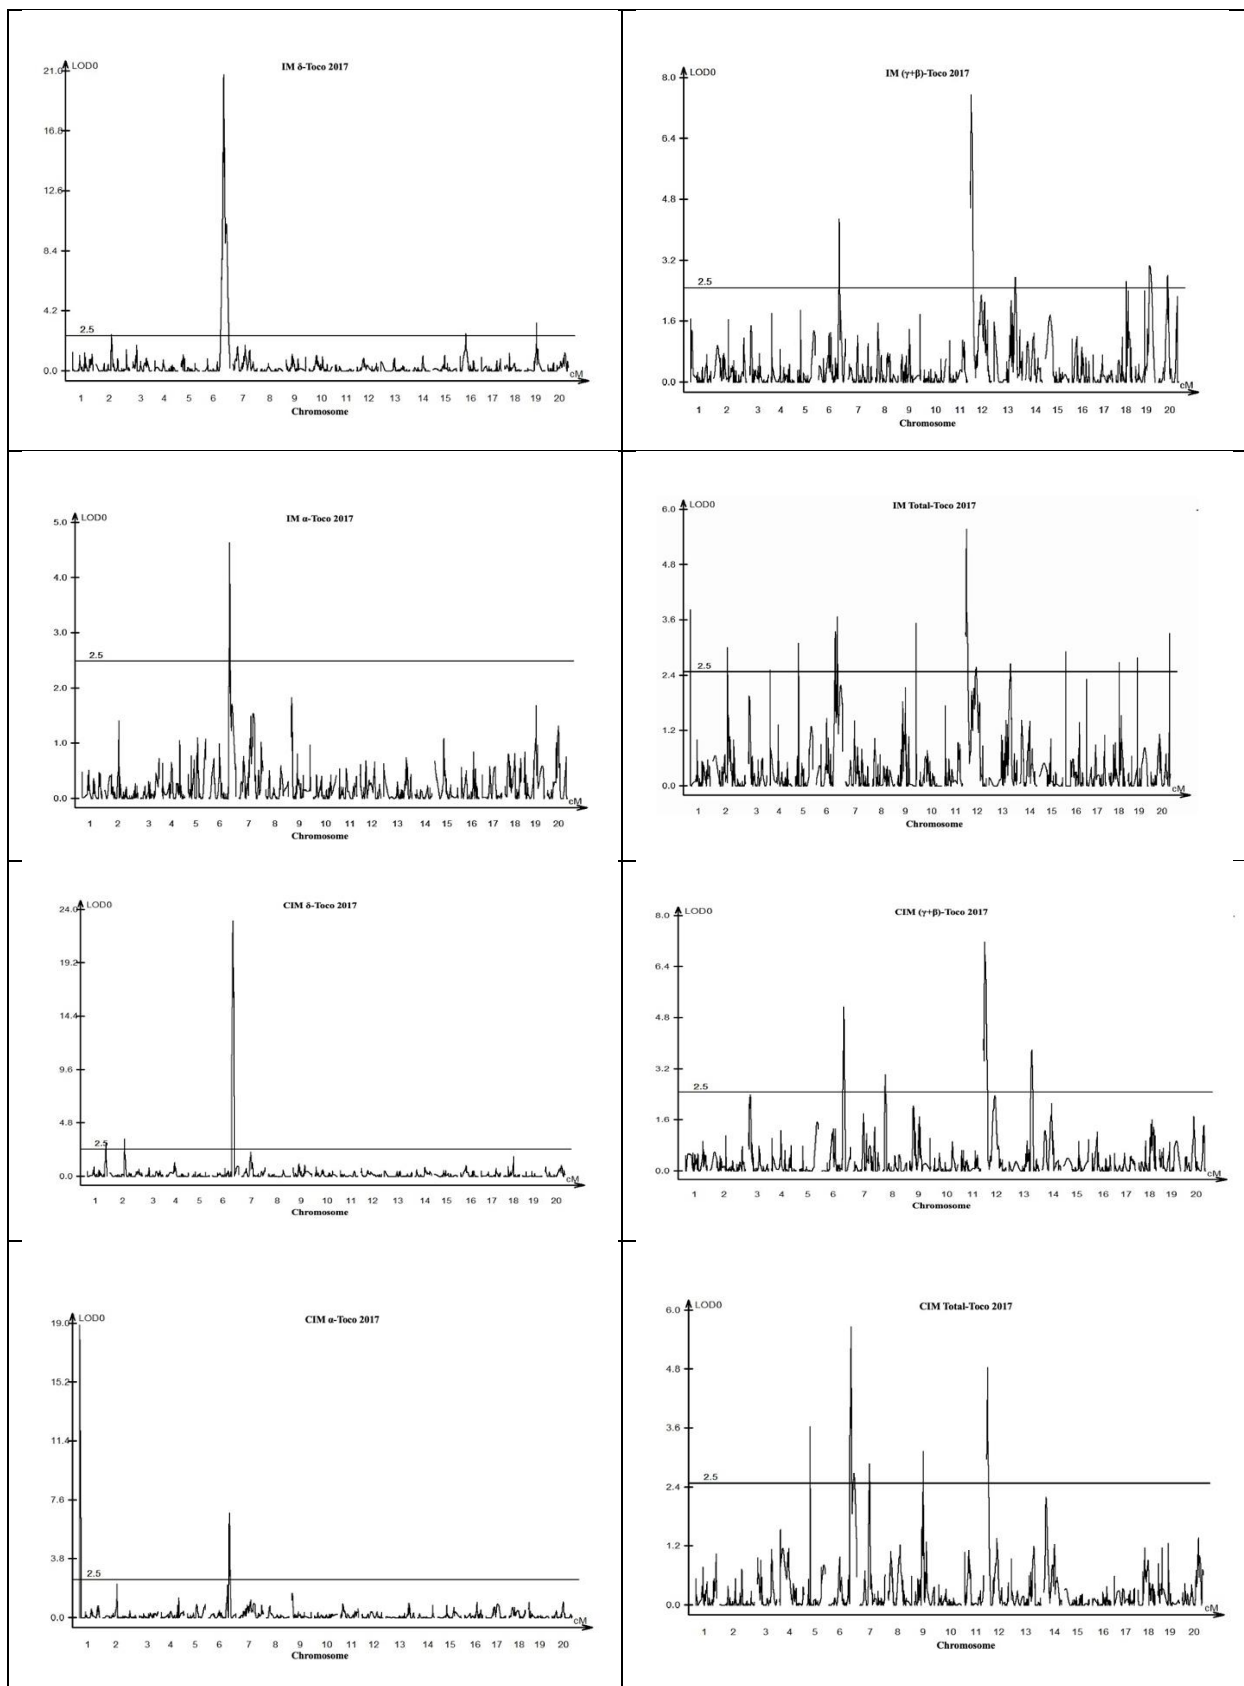

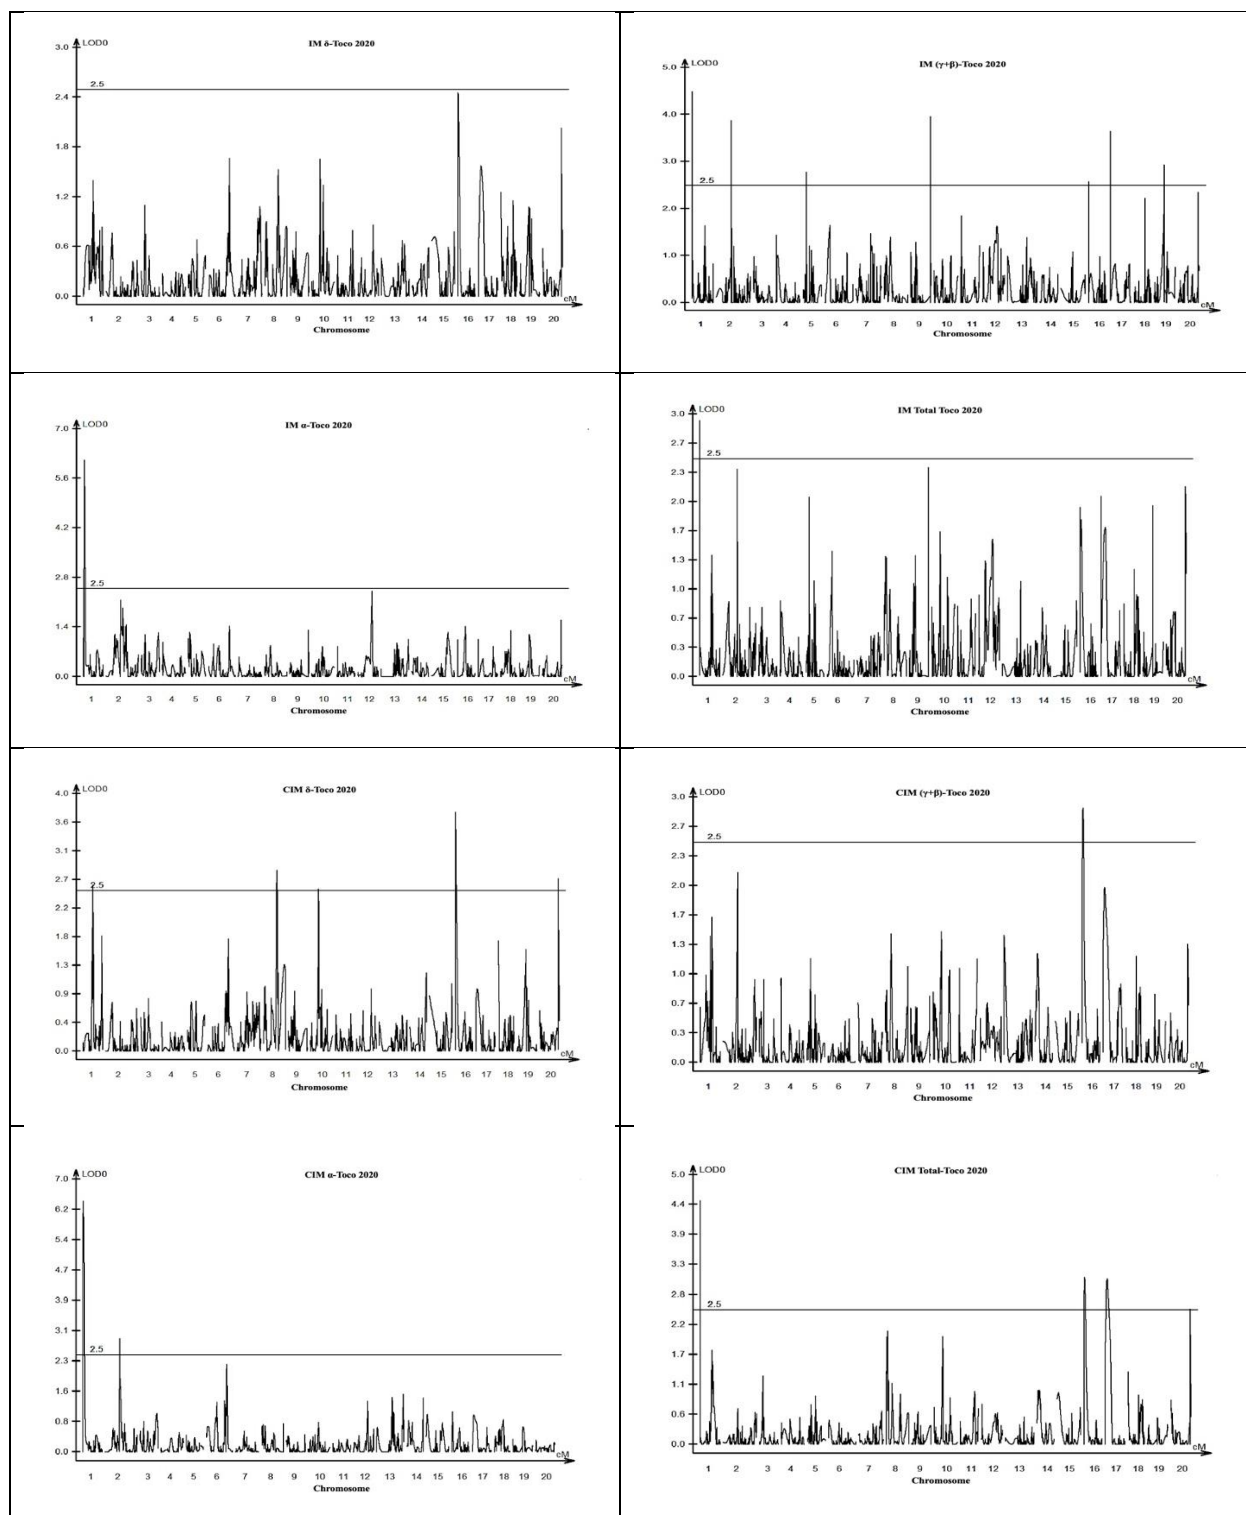

**Figure S2.** QTL that control seed  $\alpha$ -Tocopherol ( $\alpha$ -Toc),  $\delta$ -Tocopherol ( $\delta$ -Toc),  $(\gamma+\beta)$ -Tocopherol ( $(\gamma+\beta)$ -Toc), and Total-Tocopherols (T-Toc) contents identified by IM and CIM methods in the F $\times$ W82 RIL population grown in two environments in Carbondale, IL over two years (2017 and 2020).
